# Supplementary material
Source: publisher site journal article supplement (https://www.dovepress.com/article/347630)
Supplement: Supplementary file 1 [file get_supplementary_file.php]

**Supplementary Table 1 Comparison of the relative abundance of top20 genera**

| Genus                                   | Relative abundance         |                            |                            |                            |
|-----------------------------------------|----------------------------|----------------------------|----------------------------|----------------------------|
|                                         | Control                    | OSA                        | HTN                        | Complication               |
| <i>Streptococcus</i>                    | 0.4143212007±0.14174702546 | 0.3964246426±0.16127655774 | 0.3240346322±0.09311698823 | 0.3988937977±0.10517081180 |
| <i>Neisseria</i>                        | 0.08995522±0.09666919635   | 0.1007344248±0.10987541224 | 0.1420568461±0.08662078742 | 0.0965300554±0.10580121502 |
| <i>Rothia</i>                           | 0.0501138326±0.03768348856 | 0.0873427844±0.06692349856 | 0.1017201909±0.06629898867 | 0.0919185577±0.06846526492 |
| <i>Prevotella</i>                       | 0.0969961056±0.07226855445 | 0.0570204833±0.04457849175 | 0.0909722965±0.06993571623 | 0.0753835485±0.06296925666 |
| <i>Actinomyces</i>                      | 0.0788992978±0.03642369355 | 0.0890082863±0.05662807492 | 0.0558069426±0.04658287127 | 0.0620509846±0.03335582696 |
| <i>Haemophilus</i>                      | 0.0406676978±0.04047247681 | 0.021681817±0.02068928056  | 0.0569539474±0.03593220977 | 0.0288440127±0.02819277183 |
| <i>Gemella</i>                          | 0.0256227096±0.01611470372 | 0.0358191633±0.02461409913 | 0.0353372483±0.03994551836 | 0.0374486869±0.02857688604 |
| <i>Porphyromonas</i>                    | 0.030147583±0.02349521451  | 0.0334139937±0.02461409913 | 0.0290799391±0.02416492297 | 0.0386704269±0.05857803150 |
| <i>Veillonella</i>                      | 0.0215391374±0.01754118868 | 0.0199111278±0.01416713604 | 0.0231291009±0.01620683415 | 0.0235916004±0.01401151193 |
| <i>Granulicatella</i>                   | 0.0154676456±0.01020172092 | 0.0234645896±0.01287302933 | 0.0150097996±0.00812322858 | 0.0206627154±0.01402781157 |
| <i>Fusobacterium</i>                    | 0.0165082726±0.02464224476 | 0.0178470378±0.01990813036 | 0.0207181717±0.01235823823 | 0.0181445119±0.01936547239 |
| <i>Leptotrichia</i>                     | 0.0071679767±0.00899310998 | 0.0086077033±0.01171473748 | 0.0093715865±0.00973087586 | 0.0102590138±0.02361584247 |
| <i>Lautropia</i>                        | 0.0079911752±0.03752374590 | 0.0010536944±0.00099921507 | 0.0196936448±0.04543889694 | 0.0049671±0.01161077164    |
| <i>Absconditabacteria_(SR1)_[G-1]</i>   | 0.0101237674±0.04543889694 | 0.013377827±0.02425590095  | 0.0024478248±0.00278533221 | 0.0034356315±0.00418105546 |
| <i>Corynebacterium</i>                  | 0.0050583737±0.00661114233 | 0.0080163007±0.01420935539 | 0.0036180104±0.00275804189 | 0.0052083988±0.00635194066 |
| <i>Peptostreptococcaceae_[XII][G-1]</i> | 0.0056338096±0.00468853736 | 0.0085290619±0.01042850248 | 0.0028493857±0.00359940346 | 0.0043886208±0.00383096596 |
| <i>Treponema</i>                        | 0.0026034256±0.00422973682 | 0.0050886593±0.01461153556 | 0.0053706835±0.00936328938 | 0.0078494508±0.01489065747 |
| <i>Oribacterium</i>                     | 0.0052167207±0.00325652254 | 0.0045516485±0.00310176715 | 0.0043353822±0.00417630970 | 0.0030544838±0.00201670375 |
| <i>Aggregatibacter</i>                  | 0.0023581152±0.00335448793 | 0.0035719611±0.00532217133 | 0.00511335±0.00450703869   | 0.0041907996±0.00526115319 |
| <i>Peptostreptococcus</i>               | 0.002969003±0.00250306278  | 0.0055778611±0.00395925535 | 0.0010254883±0.00154704162 | 0.0036311704±0.00572407768 |

**Continued Supplementary Table 1**

| Genus                                  |        | P value        |                |                         |            |                     |                     |
|----------------------------------------|--------|----------------|----------------|-------------------------|------------|---------------------|---------------------|
|                                        |        | Control vs OSA | Control vs HTN | Control vs Complication | OSA vs HTN | OSA vs Complication | HTN vs Complication |
| <i>Streptococcus</i>                   | 0.08   |                |                |                         |            |                     |                     |
| <i>Neisseria</i>                       | 0.025  |                | 0.043          |                         |            |                     |                     |
| <i>Rothia</i>                          | 0.017  | 0.027          | 0.004          | 0.014                   |            |                     |                     |
| <i>Prevotella</i>                      | 0.19   |                |                |                         |            |                     |                     |
| <i>Actinomyces</i>                     | 0.011  |                | 0.044          |                         | 0.009      | 0.029               |                     |
| <i>Haemophilus</i>                     | <0.001 | 0.032          |                |                         | <0.001     |                     | 0.003               |
| <i>Gemella</i>                         | 0.375  |                |                |                         |            |                     |                     |
| <i>Porphyromonas</i>                   | 0.898  |                |                |                         |            |                     |                     |
| <i>Veillonella</i>                     | 0.642  |                |                |                         |            |                     |                     |
| <i>Granulicatella</i>                  | 0.026  | 0.013          |                |                         | 0.012      |                     |                     |
| <i>Fusobacterium</i>                   | 0.086  |                |                |                         |            |                     |                     |
| <i>Leptotrichia</i>                    | 0.648  |                |                |                         |            |                     |                     |
| <i>Lautropia</i>                       | <0.001 |                | <0.001         |                         | <0.001     |                     | 0.01                |
| <i>Absconditabacteria_(SR1)_[G-1]</i>  | 0.013  |                | 0.005          | 0.033                   | 0.006      | 0.009               |                     |
| <i>Corynebacterium</i>                 | 0.622  |                |                |                         |            |                     |                     |
| <i>Peptostreptococcaceae_[XI][G-1]</i> | 0.016  |                |                |                         | 0.002      | 0.02                |                     |
| <i>Treponema</i>                       | 0.148  |                |                |                         |            |                     |                     |
| <i>Oribacterium</i>                    | 0.047  |                |                | 0.016                   |            |                     |                     |
| <i>Aggregatibacter</i>                 | 0.07   |                |                |                         |            |                     |                     |
| <i>Peptostreptococcus</i>              | <0.001 | 0.014          |                |                         | <0.001     |                     | 0.019               |

Abbreviations:

OSA: obstructive sleep apnea

HTN: hypertension

Complication: OSA comorbid HTN

**Supplementary Table 2 Comparison of salivary metabolomics in each group**

| Group                      | Name                                            | VIP      | Fold change | p-value  |
|----------------------------|-------------------------------------------------|----------|-------------|----------|
| OSA<br>vs Control          | 2-Hydroxyadenine                                | 1.137609 | 3.258536    | 0.004161 |
|                            | Erucic acid                                     | 3.861169 | 0.623975    | 0.007107 |
|                            | 7-Methylxanthine                                | 1.085007 | 3.177232    | 0.04235  |
|                            | Pyruvaldehyde                                   | 1.264818 | 0.58194     | 0.049553 |
| Complication<br>vs Control | L-Phenylalanine                                 | 1.329767 | 0.467094    | 0.004614 |
|                            | 4-Hydroxybutanoic acid lactone                  | 1.200538 | 0.361608    | 0.00475  |
|                            | Glutaraldehyde                                  | 1.477588 | 0.31428     | 0.006203 |
|                            | Tyramine                                        | 1.050239 | 0.51437     | 0.007616 |
|                            | Pro-Val                                         | 1.885512 | 2.84563     | 0.009365 |
|                            | DL-a-Hydroxybutyric acid                        | 1.15014  | 1.727322    | 0.009511 |
|                            | N-Acetylcadaverine                              | 1.159623 | 0.254488    | 0.010402 |
|                            | 1-Stearoyl-rac-glycerol                         | 1.133903 | 1.528148    | 0.011207 |
|                            | Erucic acid                                     | 2.683396 | 0.538079    | 0.015394 |
|                            | L-Arginine                                      | 1.065509 | 1.56692     | 0.026568 |
|                            | 3-Methylhistidine                               | 1.122851 | 1.496925    | 0.029399 |
|                            | Phe-Pro                                         | 1.077532 | 0.191081    | 0.031203 |
|                            | Taurine                                         | 1.068001 | 1.355322    | 0.031389 |
|                            | 3-Methylindole                                  | 1.537097 | 0.083443    | 0.040283 |
|                            | L-Methionine                                    | 1.153718 | 0.308751    | 0.04302  |
|                            | N-Acetylneuraminic acid                         | 1.094321 | 0.446246    | 0.043321 |
| Isomaltose                 | 1.277814                                        | 0.218265 | 0.043385    |          |
| Complication<br>vs OSA     | DL-a-Hydroxybutyric acid                        | 1.15068  | 1.567957    | 0.017092 |
|                            | L-Carnitine                                     | 2.941431 | 0.475409    | 0.017329 |
|                            | Taurine                                         | 1.089218 | 1.28349     | 0.018043 |
|                            | Uridine                                         | 1.001373 | 0.205791    | 0.025098 |
|                            | Arg-Phe                                         | 1.164435 | 0.234239    | 0.046979 |
|                            | Phosphorylcholine                               | 6.253449 | 0.54013     | 0.048844 |
| Complication<br>vs HTN     | L-Carnitine                                     | 6.80549  | 1.948888    | 0.038333 |
|                            | Tyr-Gln                                         | 1.077126 | 2.824068    | 0.038634 |
|                            | N-(omega)-Hydroxyarginine                       | 1.586027 | 1.84076     | 0.045197 |
|                            | His-Ala                                         | 2.07836  | 2.338729    | 0.047875 |
| HTN<br>vs Control          | L-Phenylalanine                                 | 1.350863 | 0.439462    | 0.001707 |
|                            | 4-Hydroxybutanoic acid lactone                  | 1.191639 | 0.291686    | 0.00298  |
|                            | Phe-Tyr                                         | 1.472457 | 0.023188    | 0.004074 |
|                            | Glutaraldehyde                                  | 1.499533 | 0.263226    | 0.004428 |
|                            | DL-a-Hydroxybutyric acid                        | 1.197713 | 1.653669    | 0.005876 |
|                            | N-Docosanoyl-4-sphinganyl-1-O-phosphorylcholine | 1.083979 | 0.203411    | 0.006292 |
|                            | N-Acetylcadaverine                              | 1.194512 | 0.141375    | 0.006581 |

|                                    |          |          |          |
|------------------------------------|----------|----------|----------|
| His-Val                            | 1.016126 | 2.204788 | 0.006823 |
| Arg-Phe                            | 1.147679 | 0.131145 | 0.008227 |
| Tyr-Gln                            | 1.097486 | 0.160794 | 0.008985 |
| 1-Stearoyl-rac-glycerol            | 1.3282   | 1.779378 | 0.009633 |
| N1-Methyl-2-pyridone-5-carboxamide | 5.102518 | 0.440367 | 0.011055 |
| Phe-Phe                            | 1.978488 | 0.095549 | 0.011306 |
| Erucic acid                        | 1.961821 | 0.638302 | 0.013672 |
| L-Methionine                       | 1.487219 | 0.095947 | 0.013817 |
| Acetylcarnitine                    | 3.749609 | 0.37628  | 0.014437 |
| Tyr-Ile                            | 1.667276 | 0.123475 | 0.015654 |
| 3-Methylhistidine                  | 1.22984  | 1.558859 | 0.016045 |
| N-(omega)-Hydroxyarginine          | 1.297153 | 0.299651 | 0.017368 |
| L-Carnitine                        | 6.579985 | 0.249722 | 0.027145 |
| Phe-Pro                            | 1.153024 | 0.109202 | 0.02957  |
| Arg-Glu                            | 1.295633 | 0.20189  | 0.032702 |
| Taurine                            | 1.130959 | 1.338924 | 0.041068 |
| Lys-Pro                            | 1.878112 | 0.22952  | 0.042685 |
| Sebacic acid                       | 1.29826  | 0.346545 | 0.046038 |
| Nicotinamide                       | 3.359662 | 0.234878 | 0.048735 |

Abbreviations:

OSA: obstructive sleep apnea

HTN: hypertension

Complication: OSA comorbid HTN

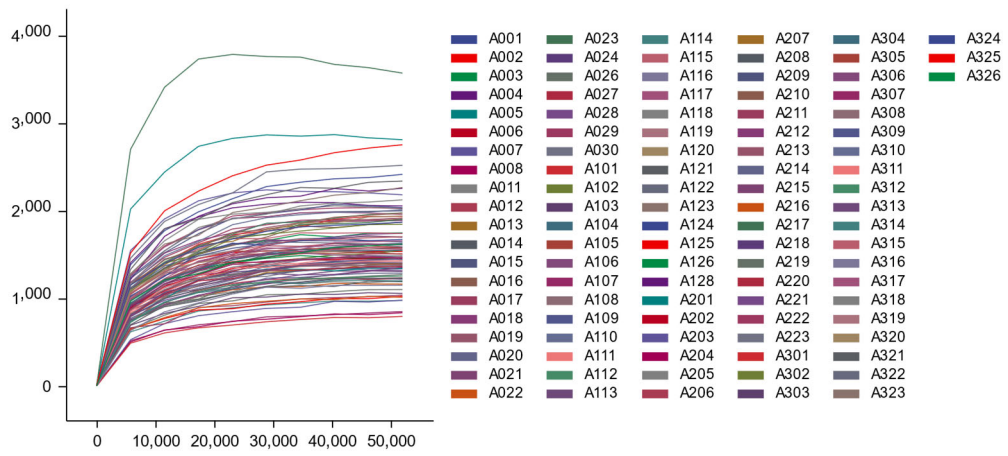

**Supplementary Figure 1: Rarefaction curve**

The shape of the rarefaction curve indicates that the plateauing stage has been completely reached, indicating that the sequencing depth of all samples is reasonable and the sequencing results could reflect the microbial information in the saliva samples.

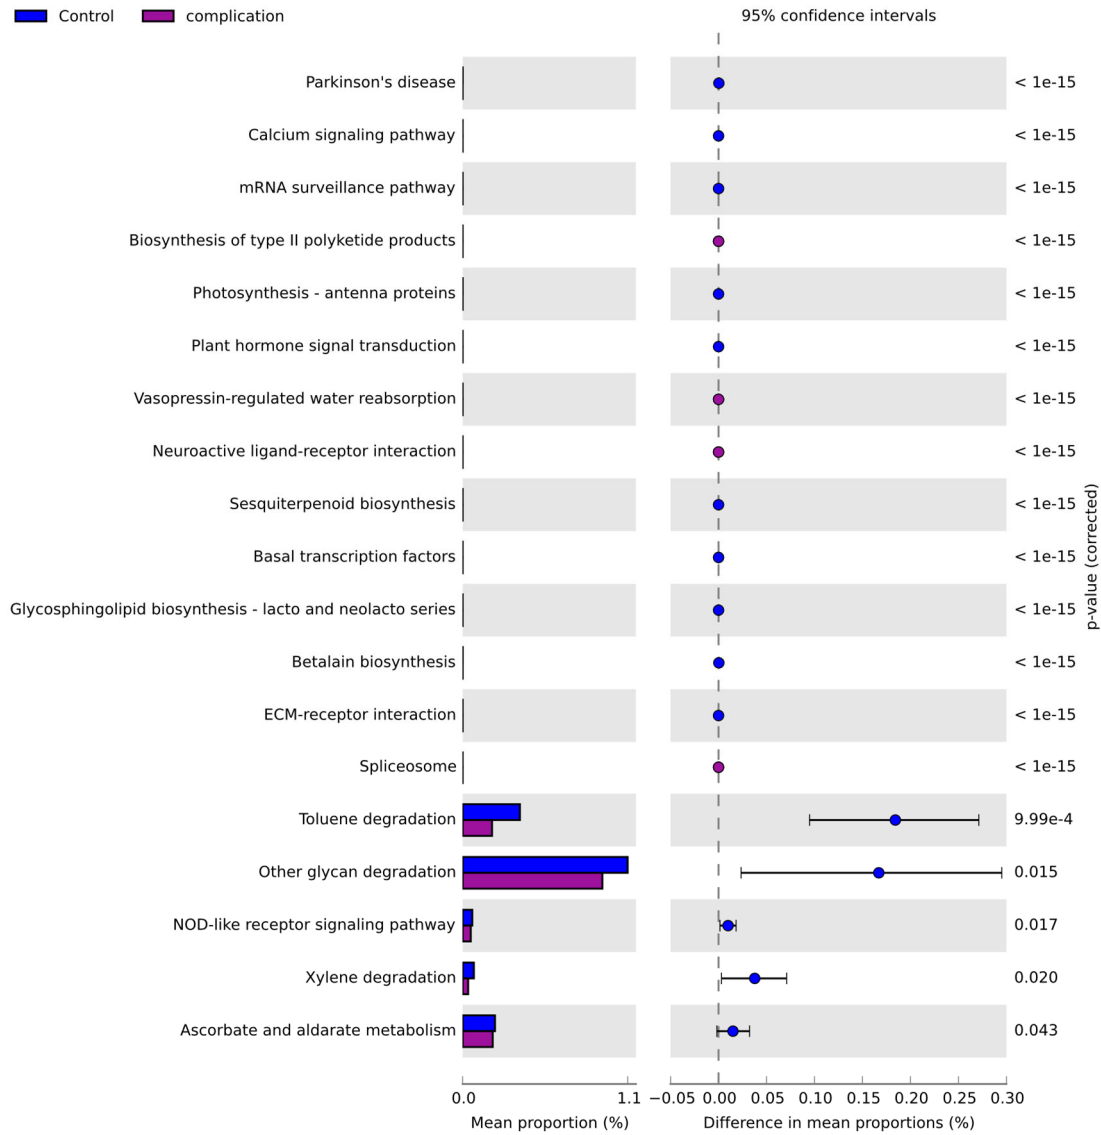

**Supplementary Figure 2: Analysis of functional differences between control group and complication group.**

Microbial functions were predicted by PICRUST2 upon Kyoto Encyclopedia of Genes and Genomes (KEGG) database identified by STAMP software. Compare with control group, the complication group had considerably less toluene degradation, Xylene degradation, ascorbate and aldarate metabolism than the control group.

Complication: obstructive sleep apnea comorbid hypertension

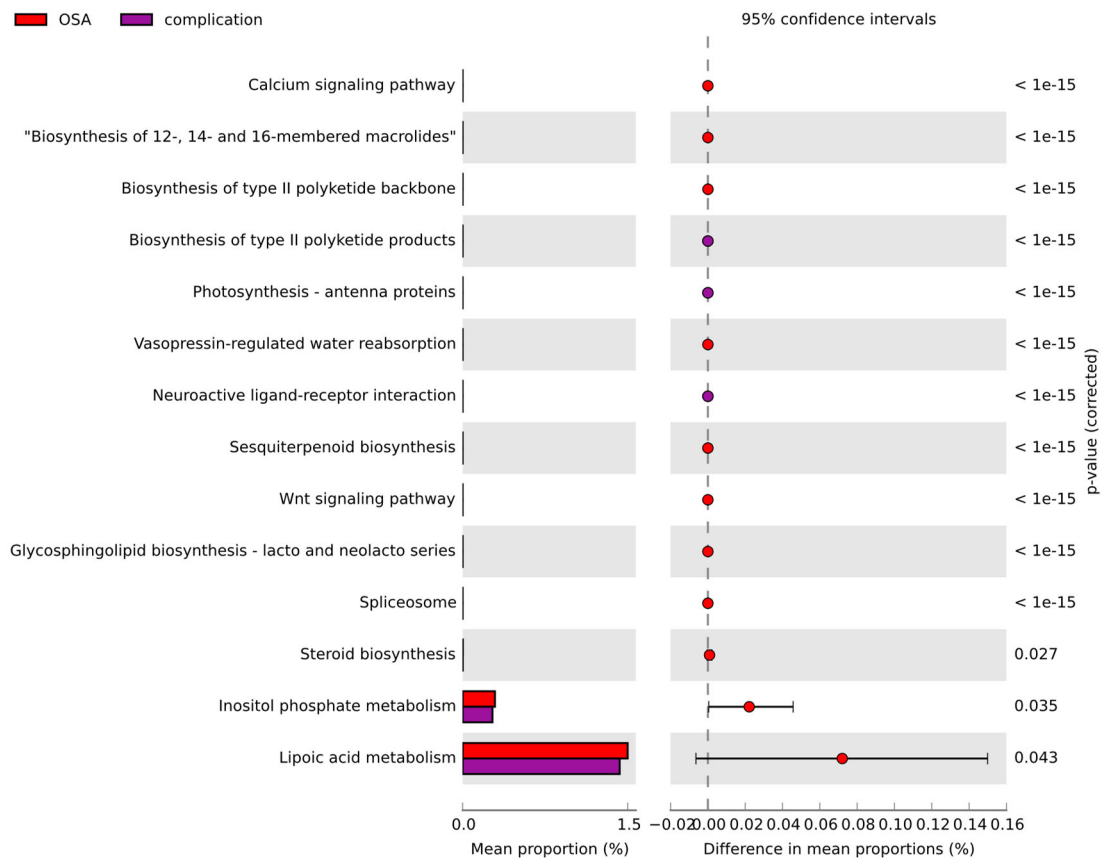

**Supplementary Figure 3: Analysis of functional differences between OSA group and complication group.**

Microbial functions were predicted by PICRUST2 upon Kyoto Encyclopedia of Genes and Genomes (KEGG) database identified by STAMP software. The complication group had considerably less vasopressin-regulated water reabsorption, steroid biosynthesis, inositol phosphate metabolism, and lipoic acid metabolism than the OSA group.

OSA: obstructive sleep apnea.

Complication: obstructive sleep apnea comorbid hypertension

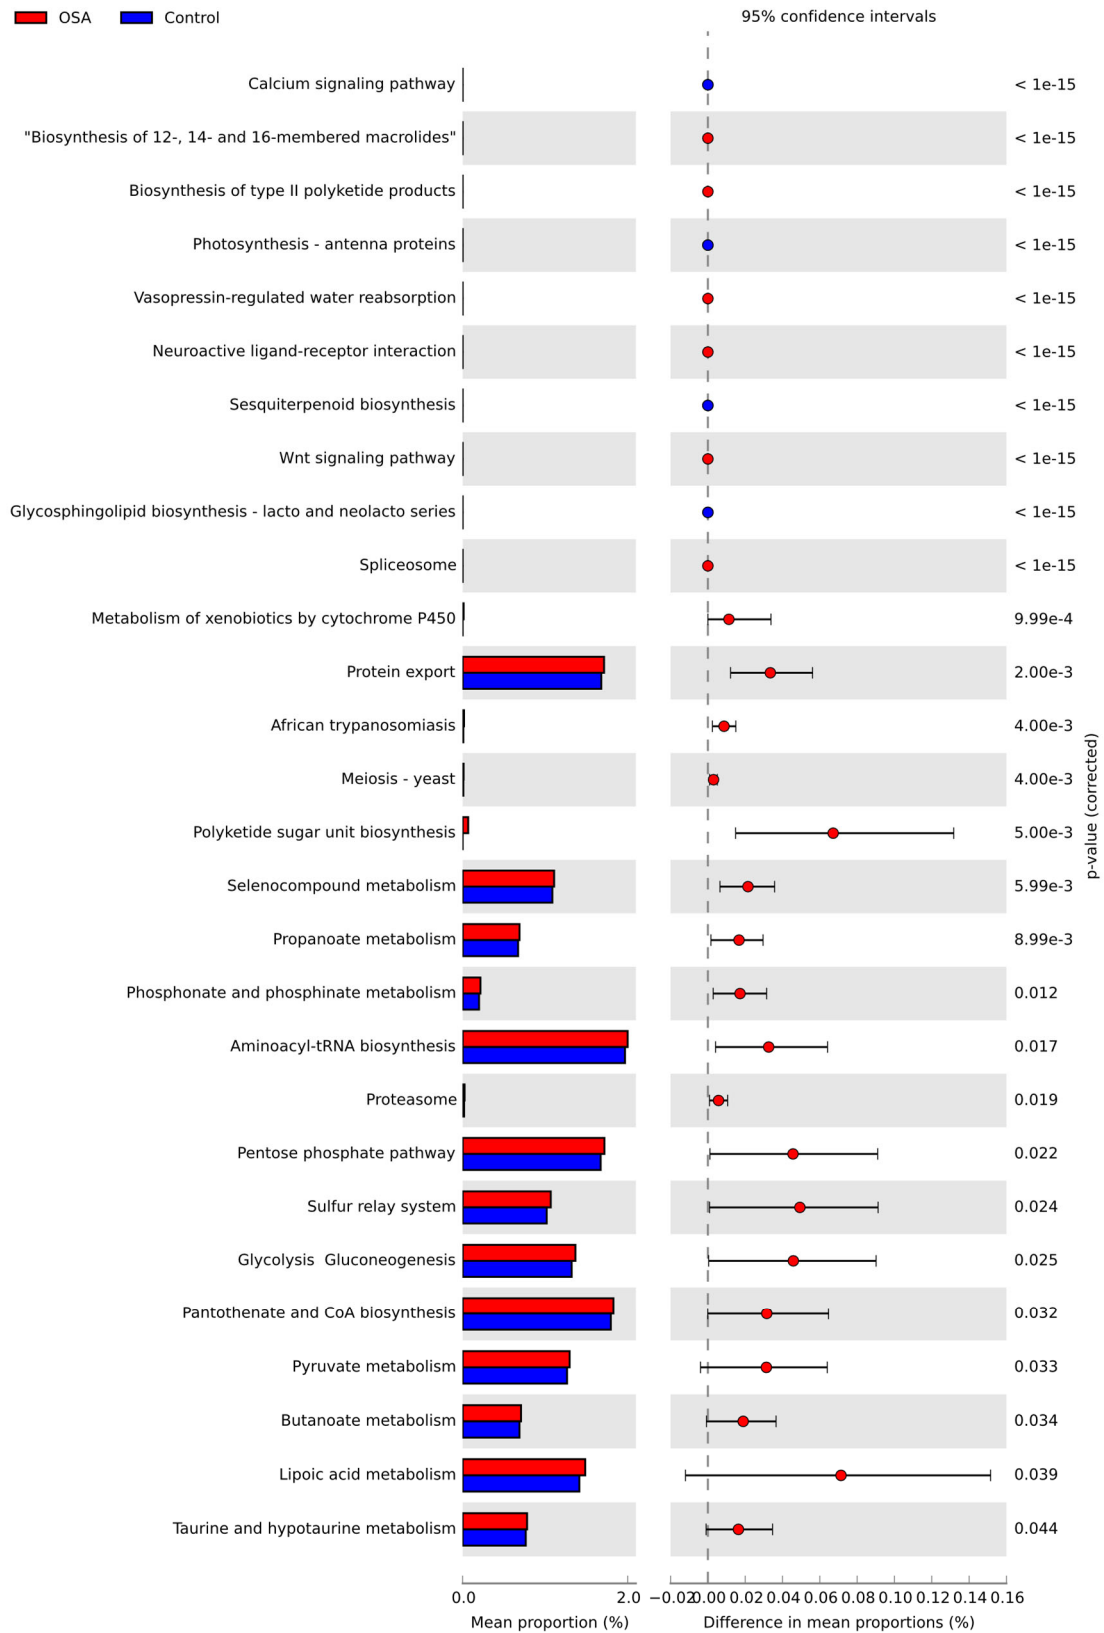

**Supplementary Figure 4: Analysis of functional differences between OSA group and control group.**



Microbial functions were predicted by PICRUSt2 upon Kyoto Encyclopedia of Genes and Genomes (KEGG) database identified by STAMP software. Compared with control group, pathways of metabolism of xenobiotics by cytochrome P450, polyketide sugar unit biosynthesis, phosphonate and phosphinate metabolism and proteasome were significant higher in OSA group.

OSA: obstructive sleep apnea

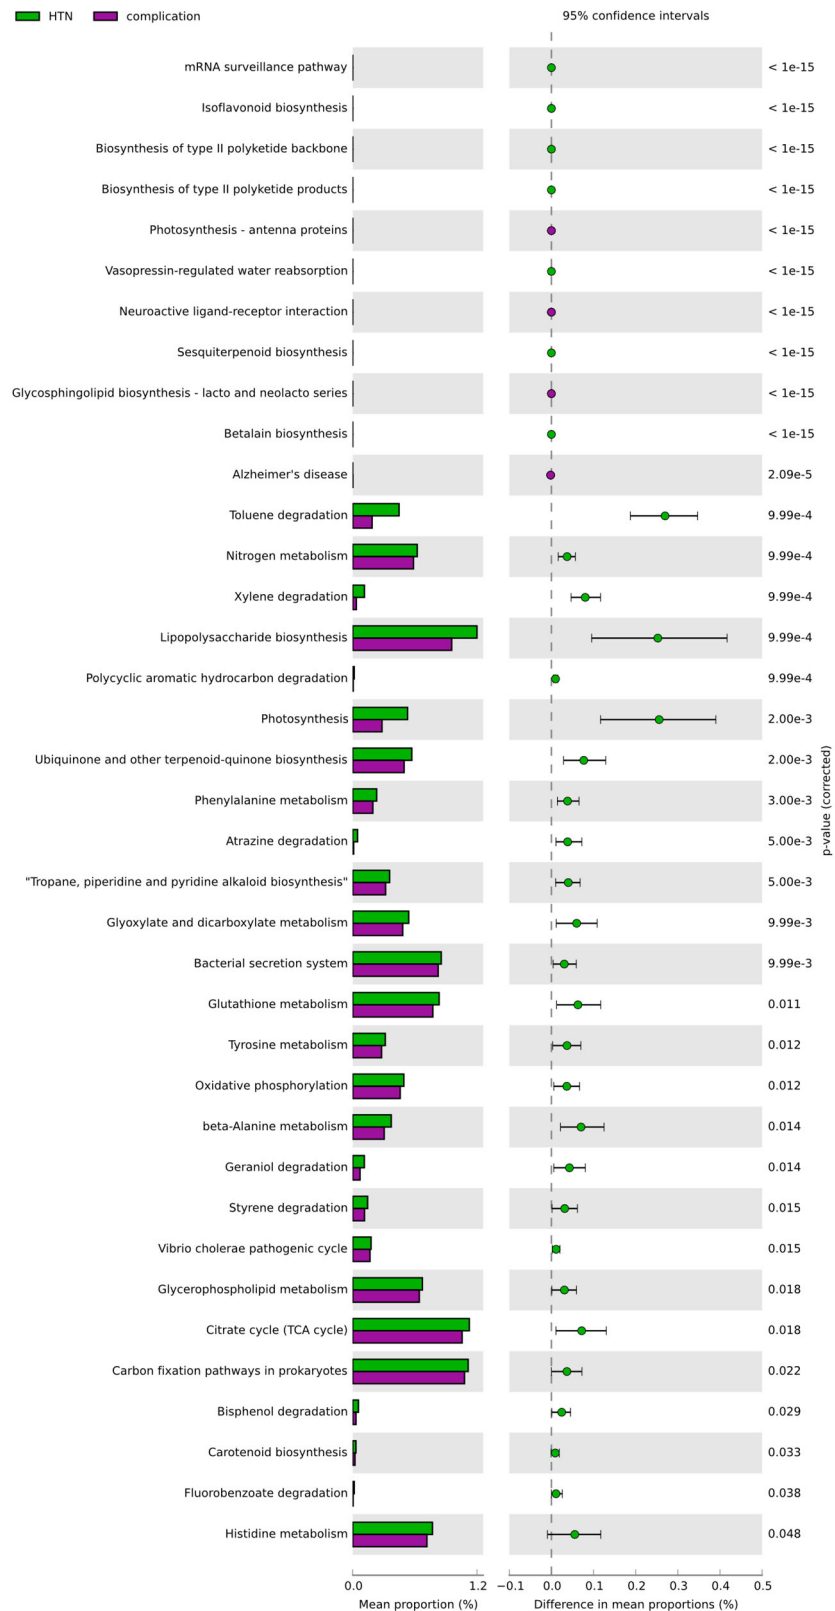

**Supplementary Figure 5: Analysis of functional differences between HTN group and complication group.**

Microbial functions were predicted by PICRUSt2 upon Kyoto Encyclopedia of Genes and Genomes (KEGG) database identified by STAMP software. Nitrogen metabolism, vasopressin-regulated water reabsorption, lipopolysaccharide production, and oxidative phosphorylation were significantly decreased in the complication group compared to the HTN group.

HTN: hypertension

Complication: obstructive sleep apnea comorbid hypertension

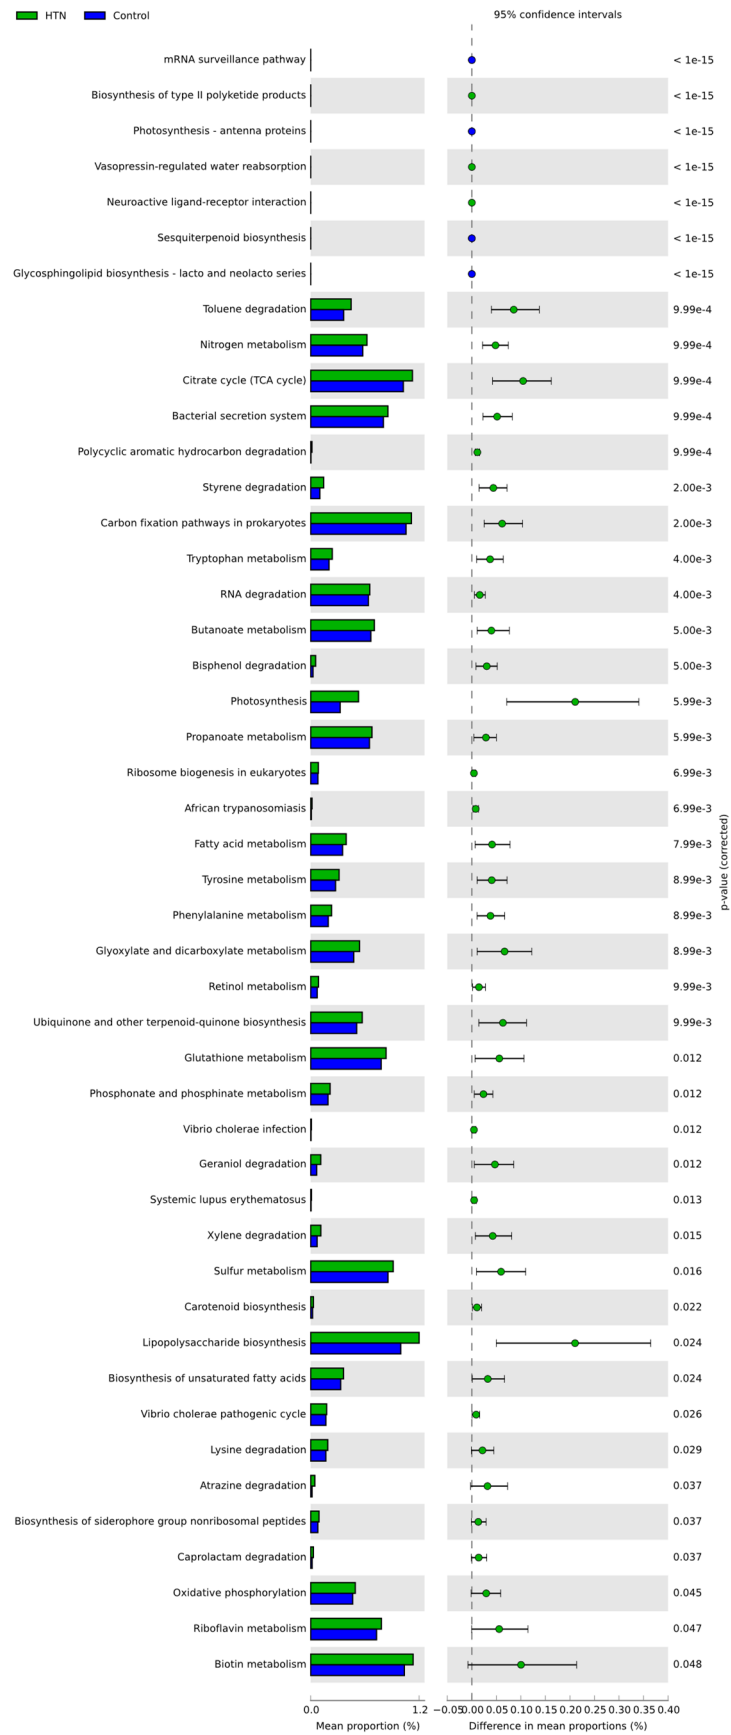

**Supplementary Figure 6: Analysis of functional differences between HTN group and control group.**

Microbial functions were predicted by PICRUSt2 upon Kyoto Encyclopedia of Genes and Genomes (KEGG) database identified by STAMP software. the result indicated that nitrogen metabolism, citrate cycle, bacterial secretion system, toluene degradation, phenylalanine metabolism, lipopolysaccharide biosynthesis, fatty acid metabolism pathways were significant higher in HTN group than the control group.

HTN: hypertension

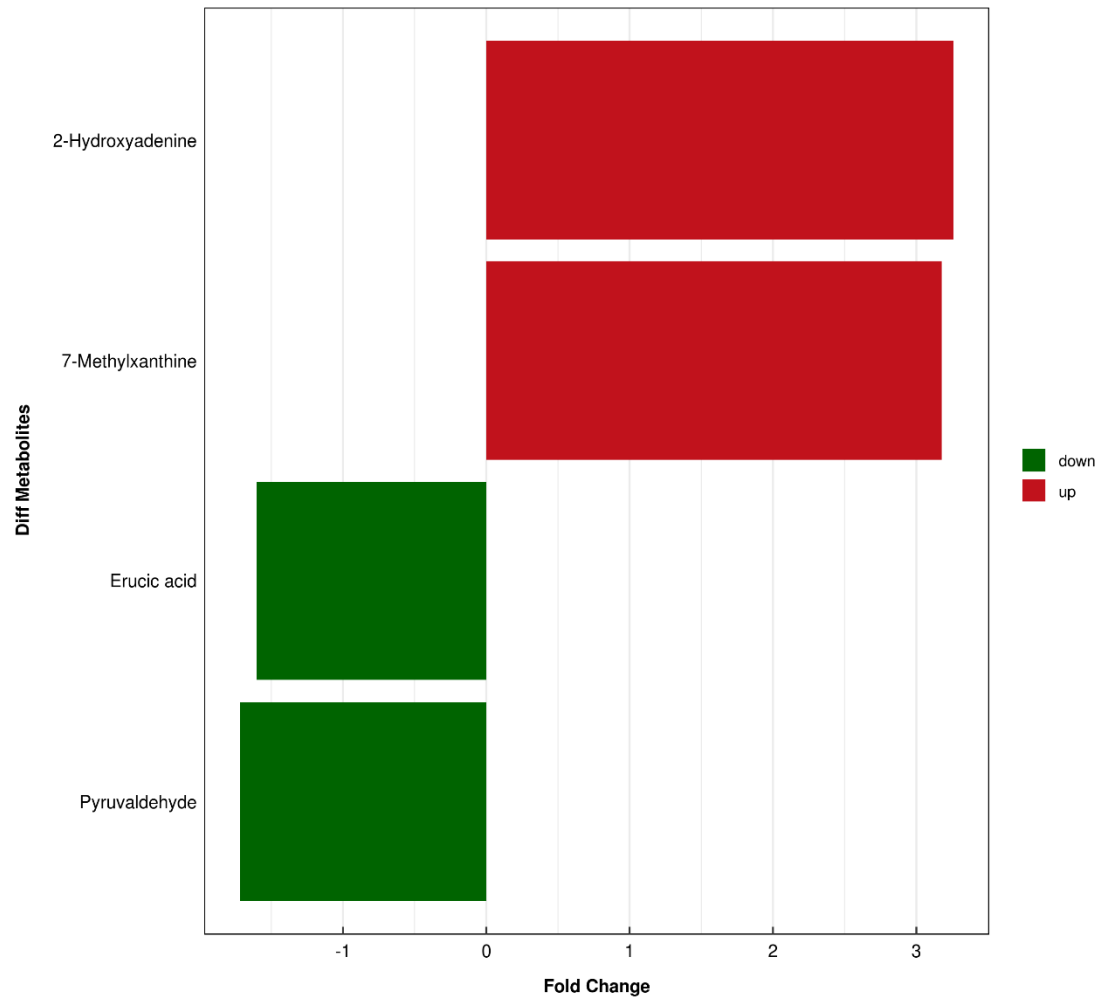

**Supplementary Figure 7: Metabolomics analysis of OSA group compared with control group.**

OSA: obstructive sleep apnea

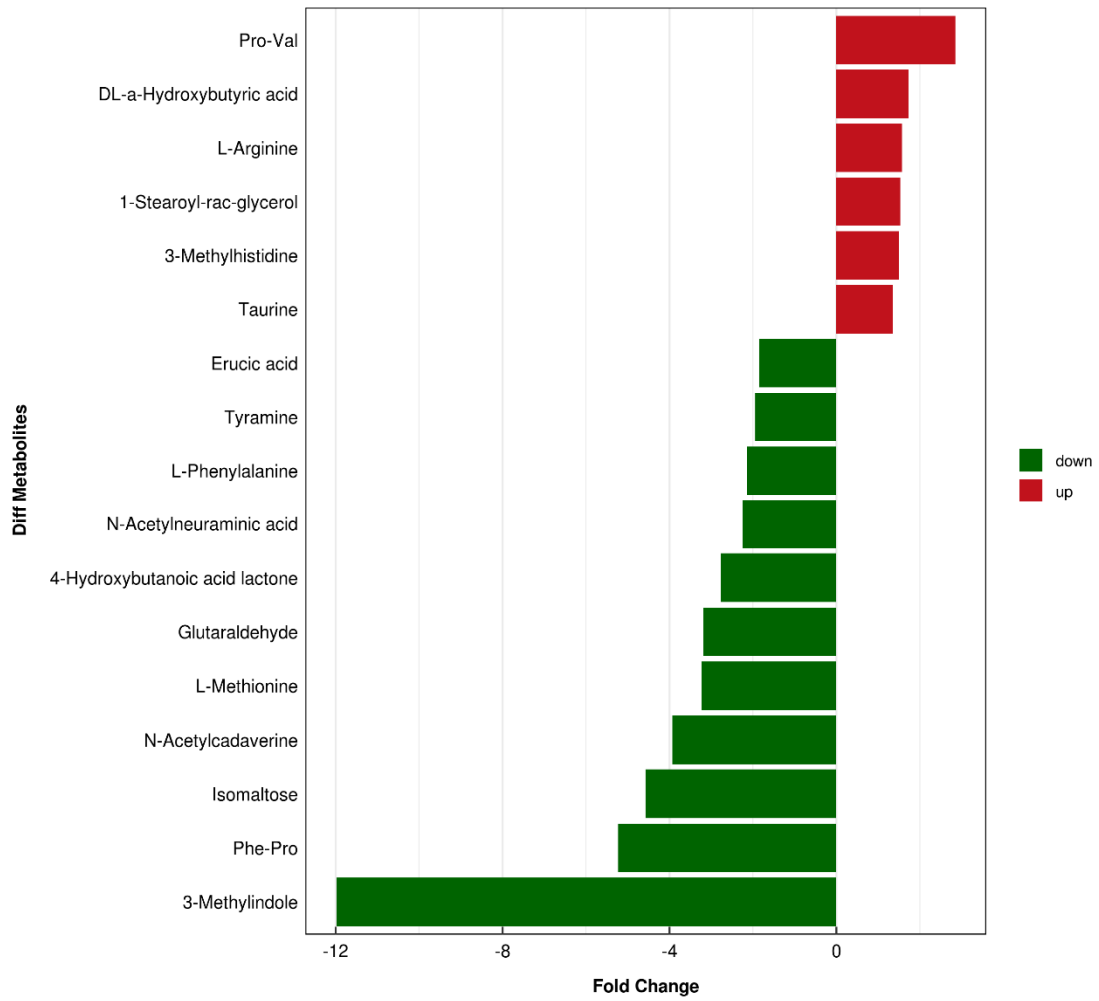

**Supplementary Figure 8: Metabolomics analysis of complication group compared with control group.**

Complication: obstructive sleep apnea comorbid hypertension

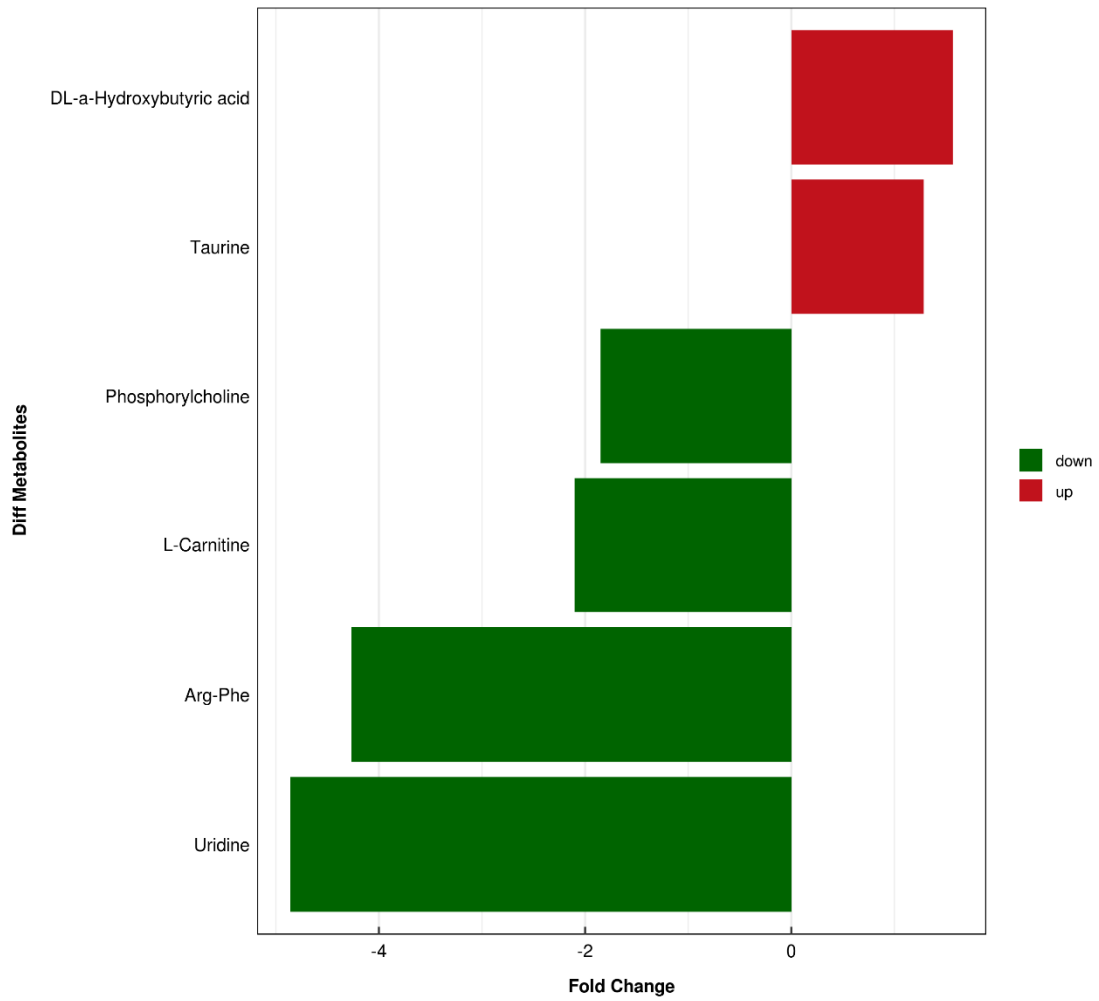

**Supplementary Figure 9: Metabolomics analysis of complication group compared with OSA group.**

Complication: obstructive sleep apnea comorbid hypertension

OSA: obstructive sleep apnea



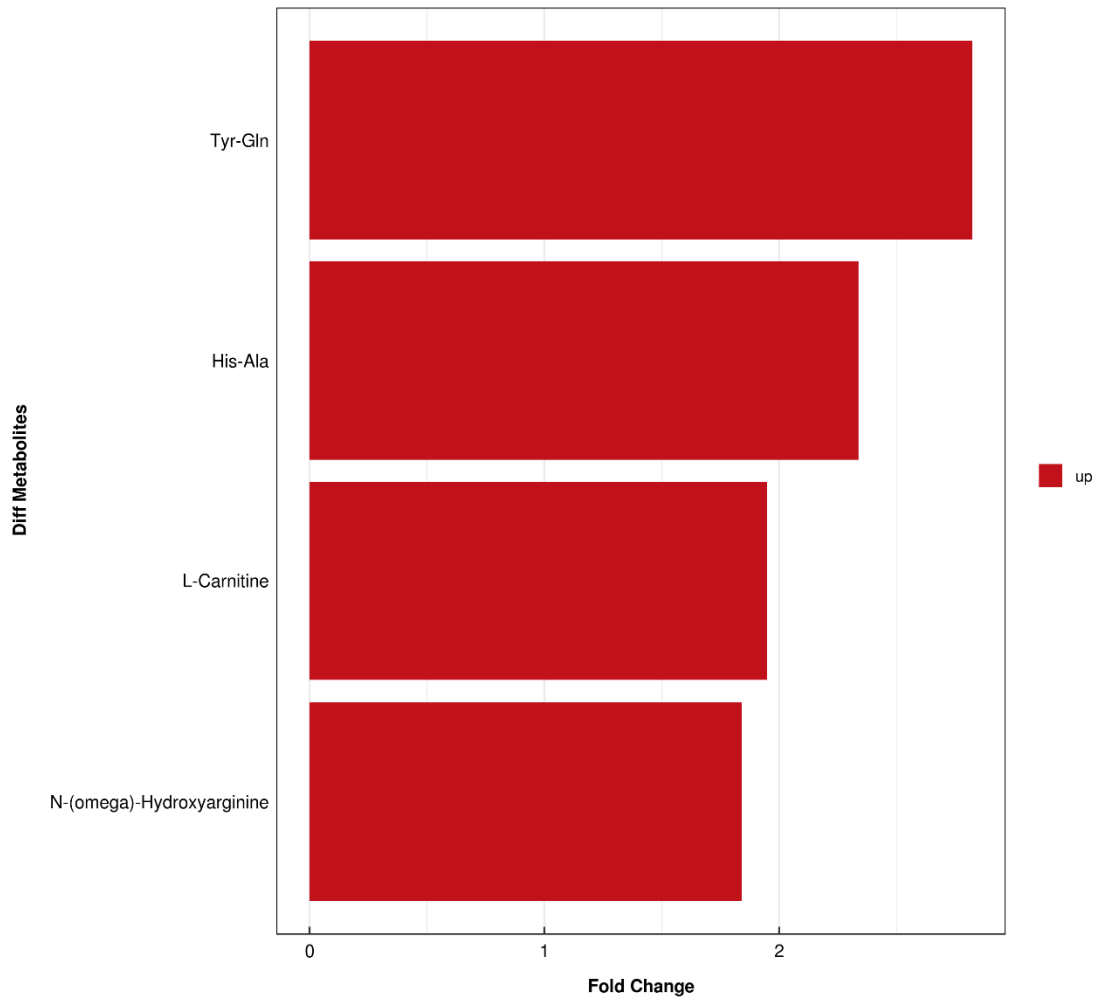

**Supplementary Figure 10: Metabolomics analysis of complication group compared with HTN group.**

Complication: obstructive sleep apnea comorbid hypertension

HTN: hypertension

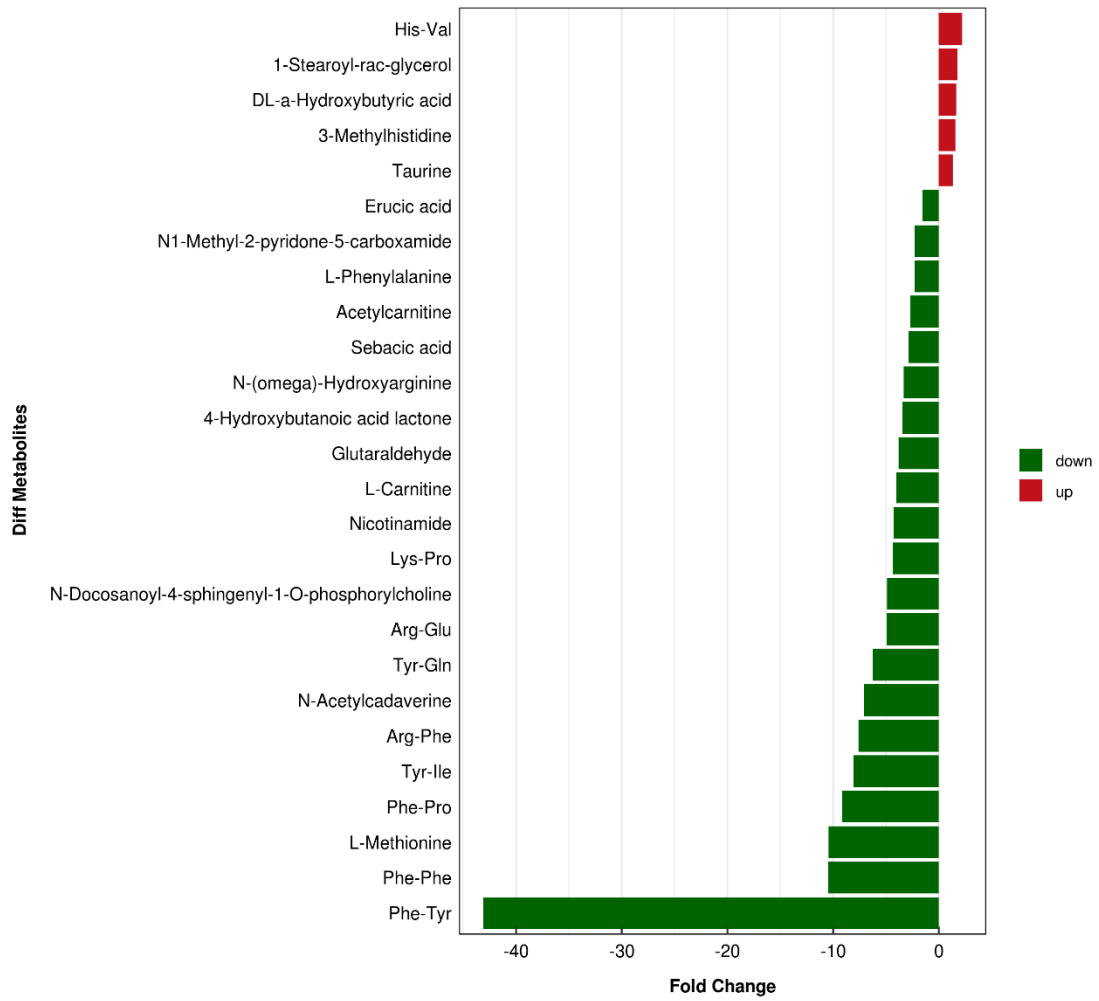

**Supplementary Figure 11: Metabolomics analysis of HTN group compared with control group.**

HTN: hypertension
